# Supplementary material
Source: PubMed Central journal article supplement (PMC4457642)

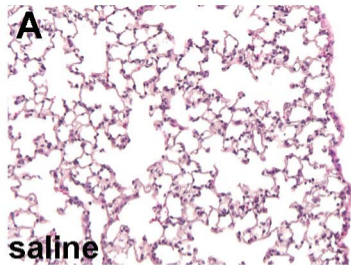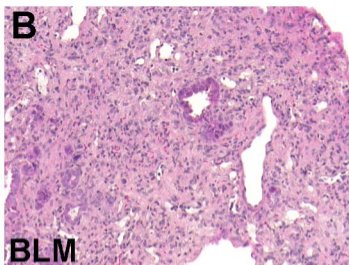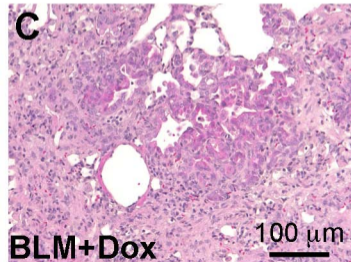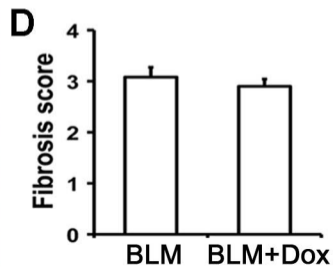

**A**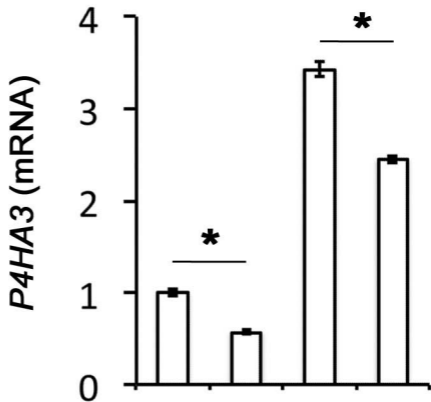

|                    |   |   |   |   |
|--------------------|---|---|---|---|
| Scramble shRNA     | + | - | + | - |
| <i>P4HA3</i> shRNA | - | + | - | + |
| TGFβ1              | - | - | + | + |

**B**

|                    |   |   |   |   |
|--------------------|---|---|---|---|
| Scramble shRNA     | + | - | + | - |
| <i>P4HA3</i> shRNA | - | + | - | + |
| TGFβ1              | - | - | + | + |

Collagen-1α(I)

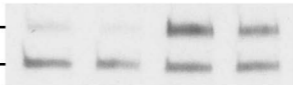

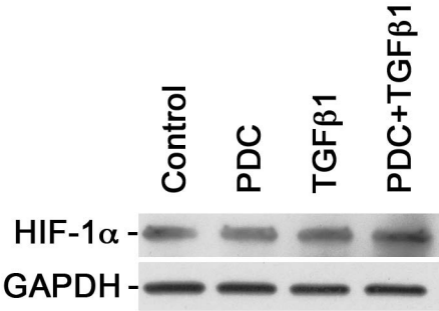

**A**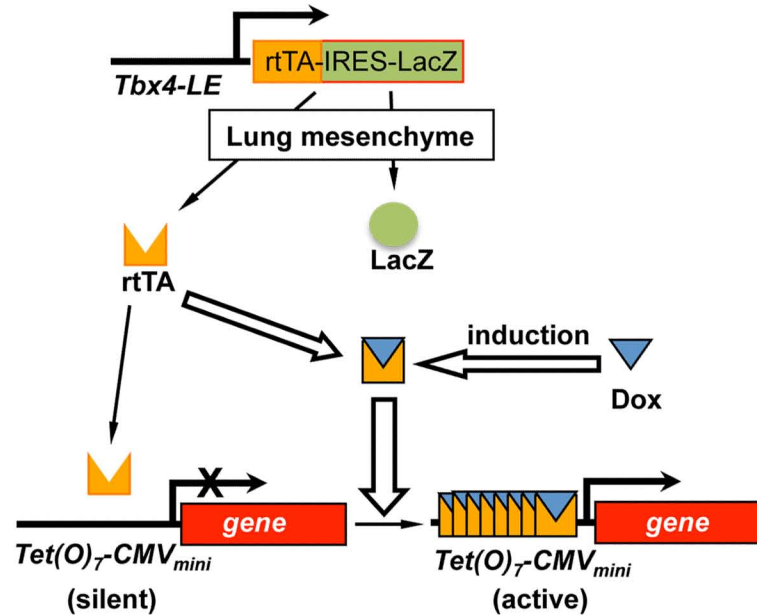**B**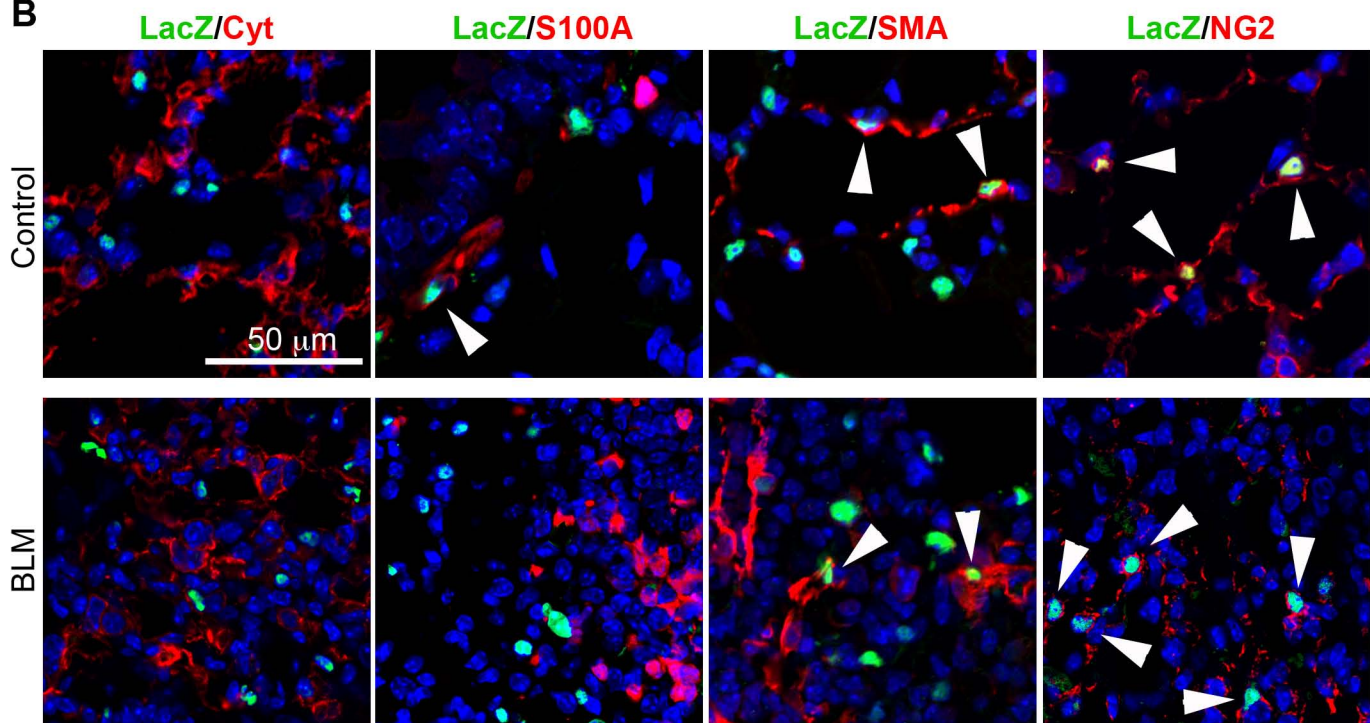

Supplement: NIHMS673337-supplement-Supp_FigureS1-S4.pdf [file NIHMS673337-supplement-Supp_FigureS1-S4.pdf]
